# Supplementary figures and images for: Transcriptome analysis of IPF fibroblastic foci identifies key pathways involved in fibrogenesis
Source: HighWire-hosted journal article supplement (doi:10.1136/thoraxjnl-2020-214902), 2020-11-19

Figure S1

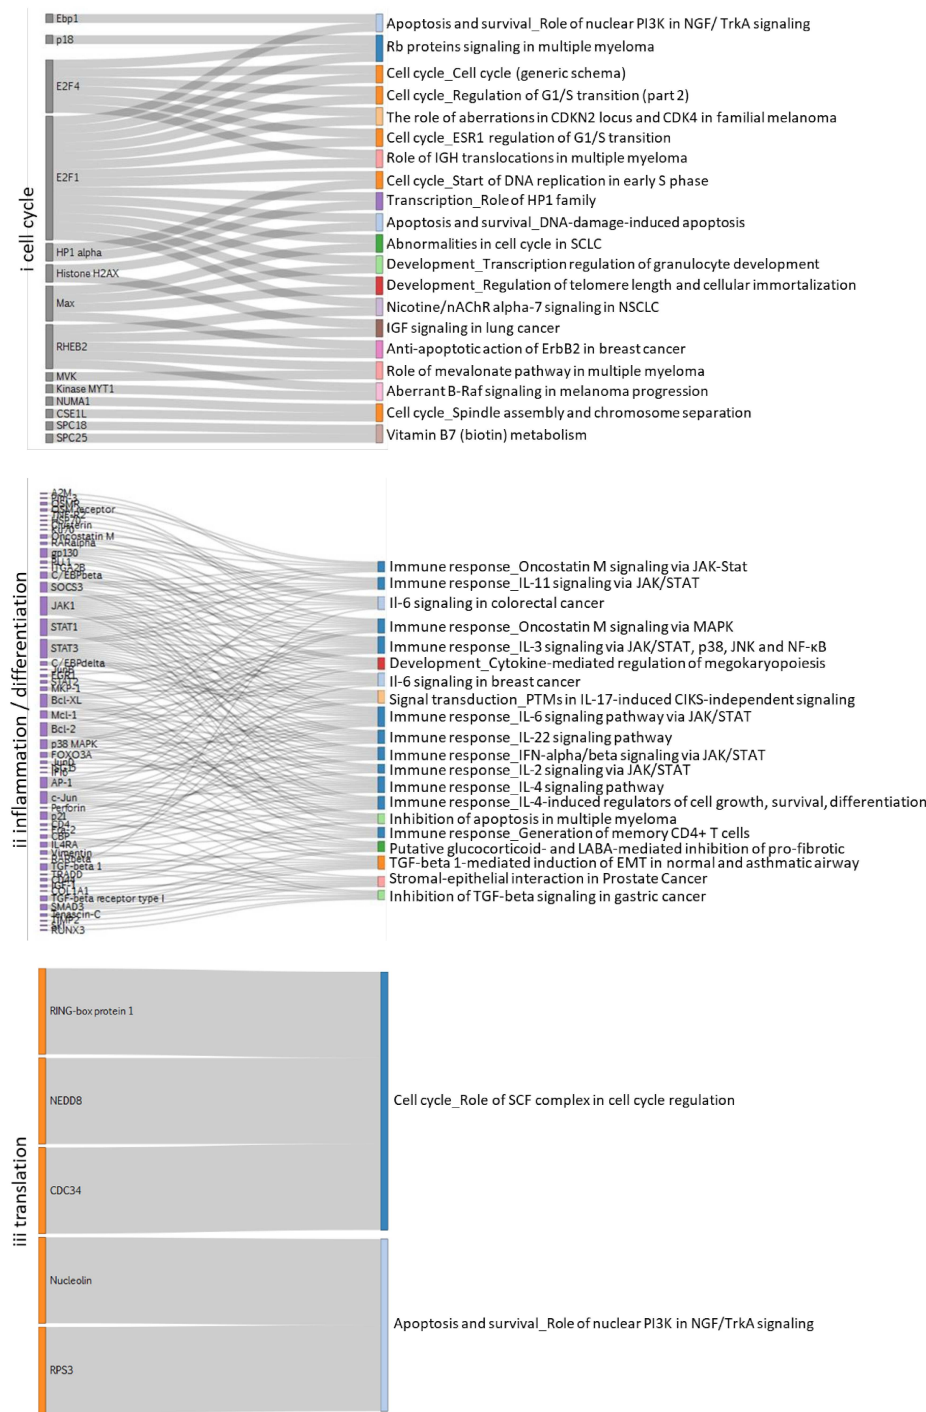

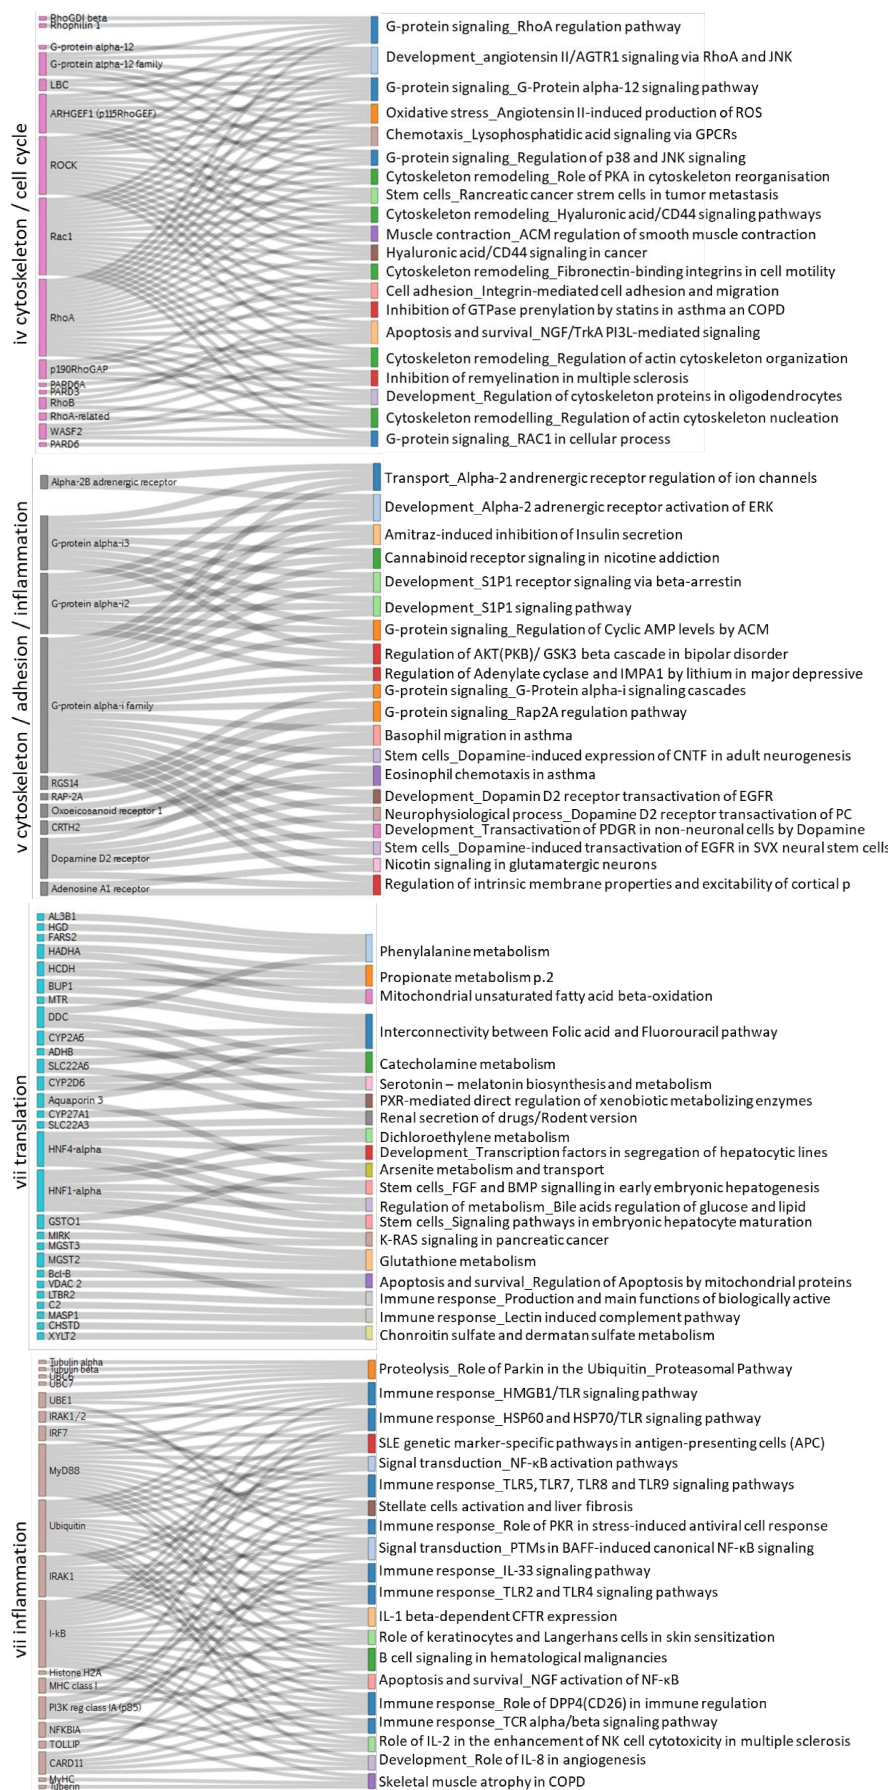

Supplement: thoraxjnl-2020-214902supp002_data_supplement.pdf [file thoraxjnl-2020-214902supp002_data_supplement.pdf]
